# Supplementary material for: Dimerization and dynamics of angiotensin-I converting enzyme revealed by cryo-EM and MD simulations
Source: eLife journal article supplement (doi:10.7554/elife.106044), 2025-04-02
Supplement: supp3 [file elife-106044-supp3-v1.pdf]

Table S3 Summary for the conformational states of individual sACE domains in our all-atom MD simulation

| Glycosylated ACE (>2 $\mu$ sec)       |                                                                                                                               |                                                                                                                     |                                                                                                                     |                                                                                                    |
|---------------------------------------|-------------------------------------------------------------------------------------------------------------------------------|---------------------------------------------------------------------------------------------------------------------|---------------------------------------------------------------------------------------------------------------------|----------------------------------------------------------------------------------------------------|
|                                       | A:ACE-N                                                                                                                       | A:ACE-C                                                                                                             | B:ACE-N                                                                                                             | B:ACE-C                                                                                            |
| run1                                  | rapid closing (<0.1 $\mu$ sec) and stay closed                                                                                | rapid closing (<0.1 $\mu$ sec) and stay closed                                                                      | rapid closing (<0.1 $\mu$ sec) and stay closed                                                                      | rapid closing (<0.1 $\mu$ sec) and stay closed                                                     |
| run2                                  | rapid closing (<0.1 $\mu$ sec) and stay closed                                                                                | rapid closing (<0.1 $\mu$ sec), then D3a slowly separated from D3b and D4 (~0.7 $\mu$ sec) to open up and stay open | rapid closing (<0.1 $\mu$ sec), then D1a slowly separated from D1b and D2 (~1.2 $\mu$ sec) to open up and stay open | rapid closing (<0.1 $\mu$ sec) and stay closed                                                     |
| run3                                  | rapid closing (<0.1 $\mu$ sec) and stay closed                                                                                | D3a slowly separated from D3b and D4 to open up and stay open                                                       | rapid closing (<0.1 $\mu$ sec) and stay closed                                                                      | rapid closing (<0.1 $\mu$ sec) and stay closed                                                     |
| run4                                  | D1a separated from D1b and D2 to open up further and stay wider open                                                          | rapid closing (<0.1 $\mu$ sec) and stay closed                                                                      | rapid closing (<0.1 $\mu$ sec), then open up (~0.7 $\mu$ sec) by D1a separated from D1b and D2 and stay open        | rapid closing (<0.1 $\mu$ sec) and stay closed                                                     |
| Non-glycosylated ACE (>1.8 $\mu$ sec) |                                                                                                                               |                                                                                                                     |                                                                                                                     |                                                                                                    |
| run1                                  | rapid closing (<0.1 $\mu$ sec) and stay closed                                                                                | rapid closing (<0.1 $\mu$ sec) and stay closed                                                                      | rapid closing (<0.1 $\mu$ sec) and stay closed                                                                      | stay open                                                                                          |
| run2                                  | persistent open even wider until ~0.77 $\mu$ sec, then close and stay close                                                   | rapid closing (<0.1 $\mu$ sec) and stay closed                                                                      | rapid closing (<0.1 $\mu$ sec) and stay closed                                                                      | rapid closing (<0.1 $\mu$ sec), then D3a slowly separated from D3b and D4 to open up and stay open |
| run3                                  | rapid closing (<0.1 $\mu$ sec), then D1a slowly separated from D1b and D2 (~0.4 $\mu$ sec) to open up and stay open           | rapid closing (<0.1 $\mu$ sec) and stay closed                                                                      | rapid closing (<0.1 $\mu$ sec), then open up (~0.4 $\mu$ sec) by D1a separated from D1b and D2 and stay open        | rapid closing (<0.1 $\mu$ sec) and stay closed                                                     |
| run4                                  | rapid closing (<0.1 $\mu$ sec), stay closed until ~1.5 $\mu$ sec, then D1a separated from D1b and D2 to open up and stay open | stay open till ~0.9 $\mu$ sec then close and stay closed                                                            | rapid closing (<0.1 $\mu$ sec) and stay closed                                                                      | rapid closing (<0.1 $\mu$ sec) and stay closed                                                     |
| ACE monomer                           |                                                                                                                               |                                                                                                                     |                                                                                                                     |                                                                                                    |
| run1                                  | rapid closing (<0.1 $\mu$ sec) and stay closed                                                                                | rapid closing (<0.1 $\mu$ sec) and stay closed                                                                      |                                                                                                                     |                                                                                                    |
| run2                                  | rapid closing (<0.1 $\mu$ sec) and stay closed                                                                                | rapid closing (<0.1 $\mu$ sec) and stay closed                                                                      |                                                                                                                     |                                                                                                    |
| run3                                  | rapid closing (<0.1 $\mu$ sec) and stay closed                                                                                | rapid closing (<0.1 $\mu$ sec) and stay closed                                                                      |                                                                                                                     |                                                                                                    |
