# Supplementary material for: Dimerization and dynamics of angiotensin-I converting enzyme revealed by cryo-EM and MD simulations
Source: eLife journal article supplement (doi:10.7554/elife.106044), 2025-04-02
Supplement: supp4 [file elife-106044-supp4-v1.pdf]

Table S4: summary of heterogeneity analysis

| Cryosparc | A_N                                      | A_C                                                                             | B_N                                | B_C                                                                            |
|-----------|------------------------------------------|---------------------------------------------------------------------------------|------------------------------------|--------------------------------------------------------------------------------|
| 0         | nothing                                  | open/close, open when N bends down towards it, closes when N bends away from it | nothing                            | open/close transition, opens when N bends towards it, closes when N bends away |
| 1         | open/close                               | open/close opposite of A_N                                                      | open/close opposite of A_N         | open/close together with B_N                                                   |
| 2         | open/close                               | small open/close together with A_N                                              | very small open/close              | open/close                                                                     |
| 3         | open/close                               | open/close together with A_N                                                    | small open/close                   | open/close opposite to A_C                                                     |
| 4         | open/close                               | open/close opposite of A_N                                                      | open/close together with A_N       | small open/close together with B_N                                             |
| CryoDRGN  |                                          |                                                                                 |                                    |                                                                                |
| 1         | open/close                               | small open/close opposite A_N                                                   | small open/close                   | open/close                                                                     |
| 2         | small density changes but no real motion | small density changes but not real motion                                       | open/close                         | small density changes but no real motion                                       |
| 3         | open/close                               | small density changes but no real motion                                        | open/close together with A_N       | small open/close opposite B_N                                                  |
| 4         | small density changes but no real motion | small density changes but no real motion                                        | open/close                         | open/close together with B_N                                                   |
| 5         | small open/close                         | small density chnages but no real motion                                        | small open/close together with A_N | small density changes but no real motion                                       |
